# Supplementary material for: Are meloxicam dimers really the structure-forming units in the ‘meloxicam–carboxylic acid’ co-crystals family? Relation between crystal structures and dissolution behaviour
Source: Royal Society of Chemistry journal article supplement (doi:10.1039/c1ce05902e), 2011-10-25

### ESI 1. Crystal data, structure solution and refinement details

For all structures: triclinic,  $P\bar{1}$ ,  $Z = 2$ . Experiments were carried out at 293 K with Mo  $K\alpha$  radiation using an Oxford Diffraction Gemini Ultra R CCD diffractometer. Refinement was without restraints.

|                                                                                  | 1                                                                            | 2                                                                  |
|----------------------------------------------------------------------------------|------------------------------------------------------------------------------|--------------------------------------------------------------------|
| Crystal data                                                                     |                                                                              |                                                                    |
| Chemical formula                                                                 | $C_{14}H_{13}N_3O_4S_2 \cdot 0.5(C_6H_{10}O_4)$                              | $C_{14}H_{13}N_3O_4S_2 \cdot 0.5(C_8H_6O_4)$                       |
| $M_r$                                                                            | 424.46                                                                       | 434.46                                                             |
| $a, b, c$ (Å)                                                                    | 8.3589 (9), 10.6257 (12),<br>11.7957 (13)                                    | 8.5979 (6), 10.4551 (6),<br>11.7515 (7)                            |
| $\alpha, \beta, \gamma$ (°)                                                      | 80.019 (10), 72.499 (10),<br>73.133 (10)                                     | 91.355 (5), 107.856 (6),<br>109.444 (6)                            |
| $V$ (Å <sup>3</sup> )                                                            | 951.94 (18)                                                                  | 938.79 (12)                                                        |
| $\mu$ (mm <sup>-1</sup> )                                                        | 0.32                                                                         | 0.33                                                               |
| Crystal size (mm)                                                                | 0.29 × 0.08 × 0.03                                                           | 0.20 × 0.13 × 0.08                                                 |
| Data collection                                                                  |                                                                              |                                                                    |
| Absorption correction                                                            | Multi-scan<br>( <i>CrysAlis Pro</i> ; Oxford<br>Diffraction, 2010)           | Multi-scan<br>( <i>CrysAlis Pro</i> ; Oxford<br>Diffraction, 2010) |
| $T_{\min}, T_{\max}$                                                             | 0.897, 1.000                                                                 | 0.973, 1.000                                                       |
| No. of measured, independent<br>and observed [ $I > 2\sigma(I)$ ]<br>reflections | 11767, 3892, 2218                                                            | 17934, 5721, 3365                                                  |
| $R_{\text{int}}$                                                                 | 0.052                                                                        | 0.051                                                              |
| Refinement                                                                       |                                                                              |                                                                    |
| $R[F^2 > 2\sigma(F^2)], wR(F^2), S$                                              | 0.044, 0.085, 0.86                                                           | 0.043, 0.095, 0.88                                                 |
| No. of reflections                                                               | 3892                                                                         | 5721                                                               |
| No. of parameters                                                                | 309                                                                          | 326                                                                |
| H-atom treatment                                                                 | H atoms treated by a mixture<br>of independent and constrained<br>refinement | All H-atom parameters refined                                      |
| $\Delta\rho_{\max}, \Delta\rho_{\min}$ (e Å <sup>-3</sup> )                      | 0.23, -0.25                                                                  | 0.32, -0.30                                                        |

Computer programs: *CrysAlis Pro*, (Oxford Diffraction, 2010), *SHELXS97* (Sheldrick, 2008), *SHELXL97* (Sheldrick, 2008), *Mercury* (Macrae *et al.*, 2006), *publCIF* (Westrip, 2010) and *enCIFer* (Allen *et al.*, 2004).

**ESI 2.** Structural fragments of meloxicam co-crystals

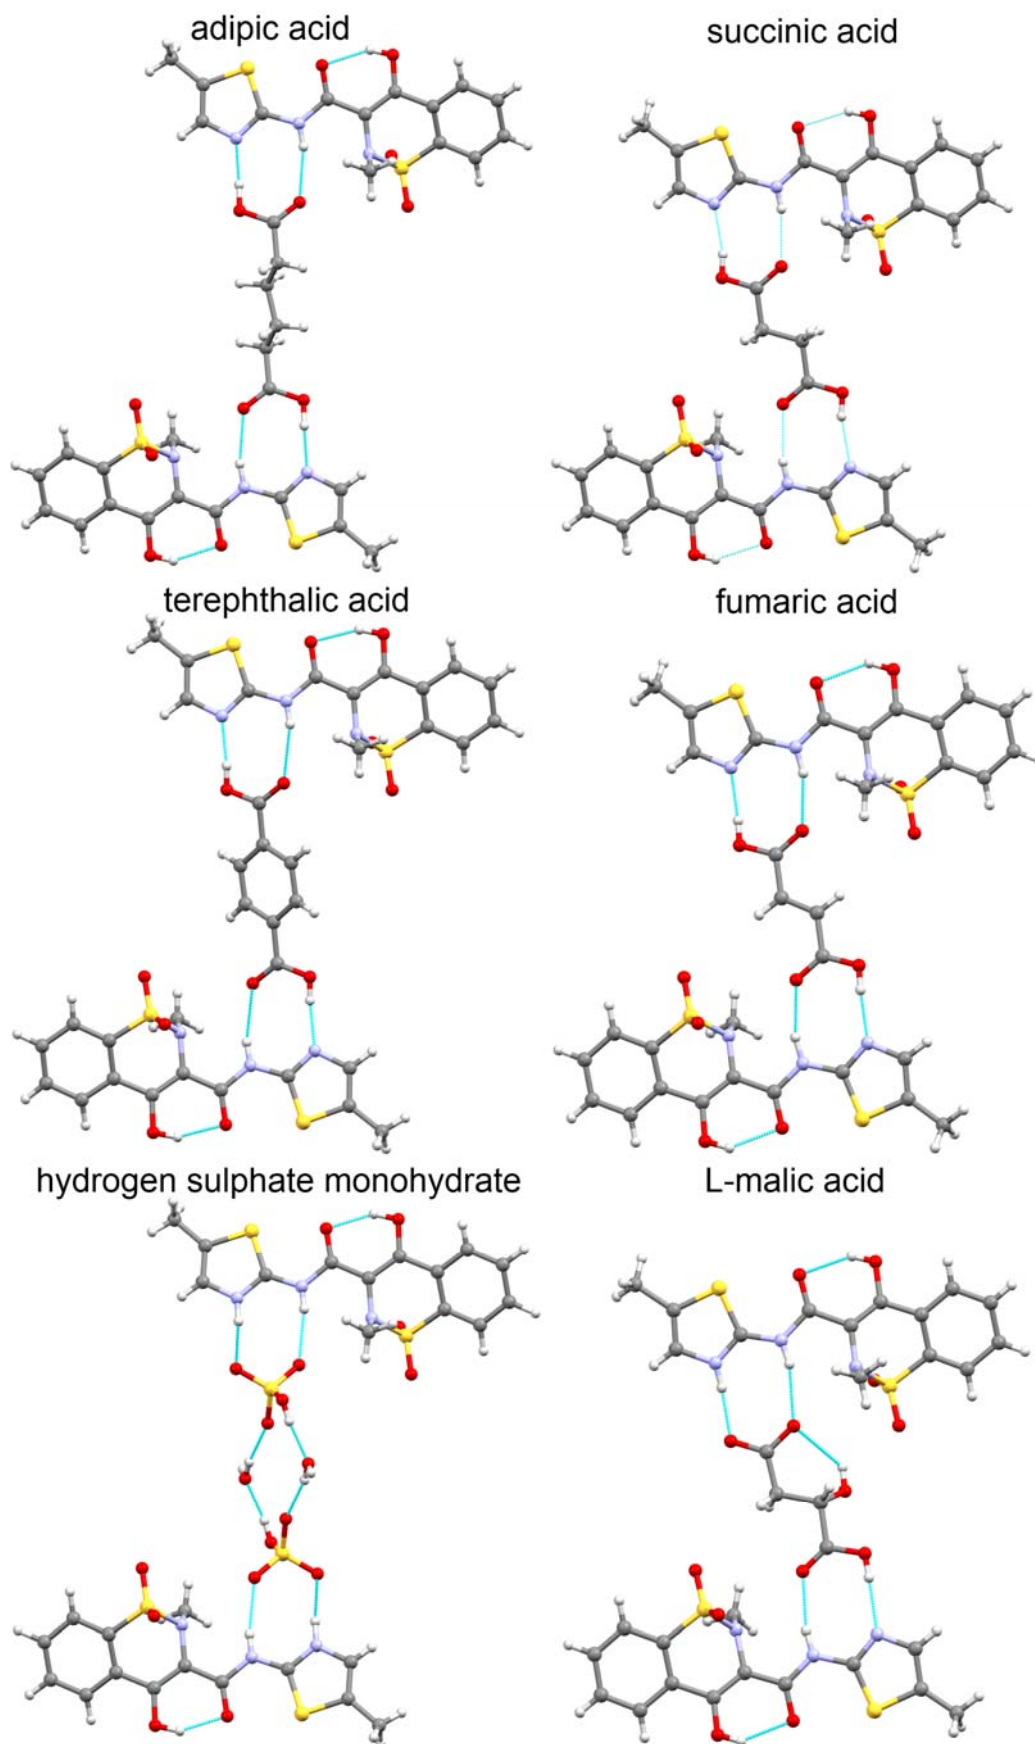

### ESI 3. Packing of 'main structural fragments' in the layers of meloxicam co-crystals

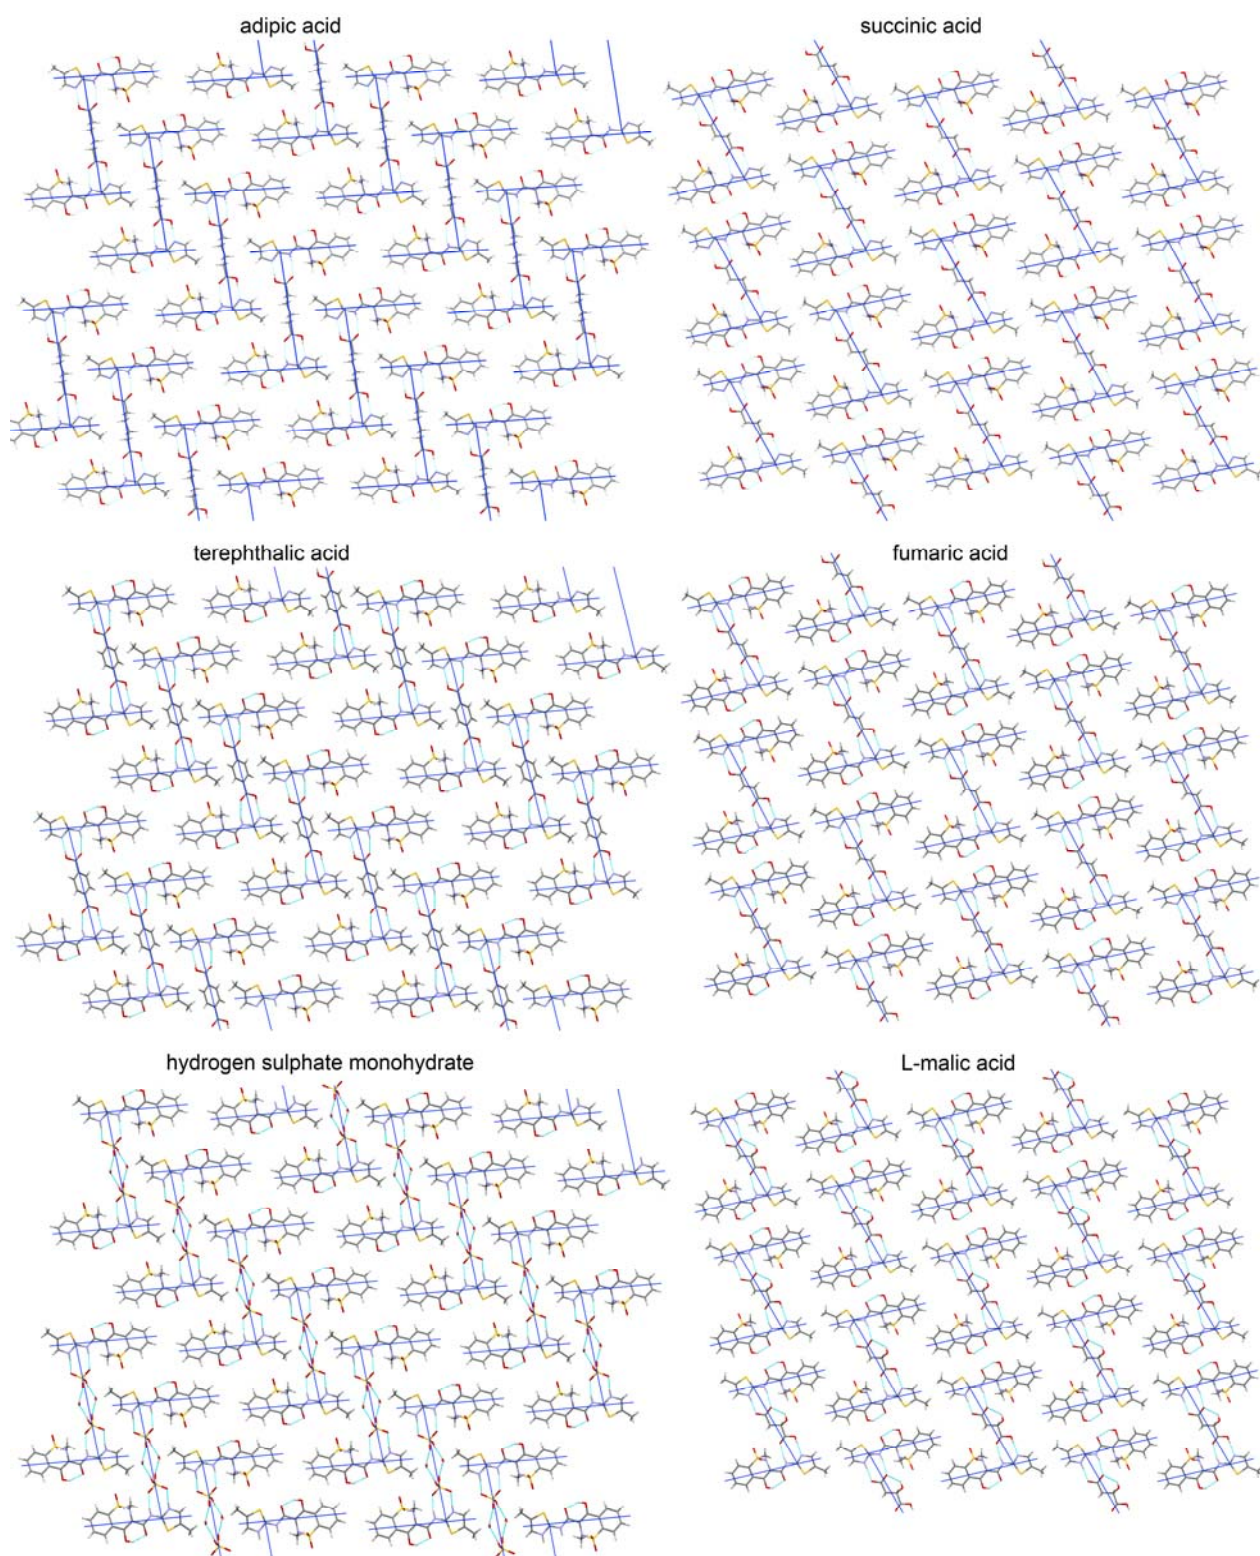

ESI 4. Two-dimensional Hirshfeld fingerprint plots of structures of meloxicam co-crystals

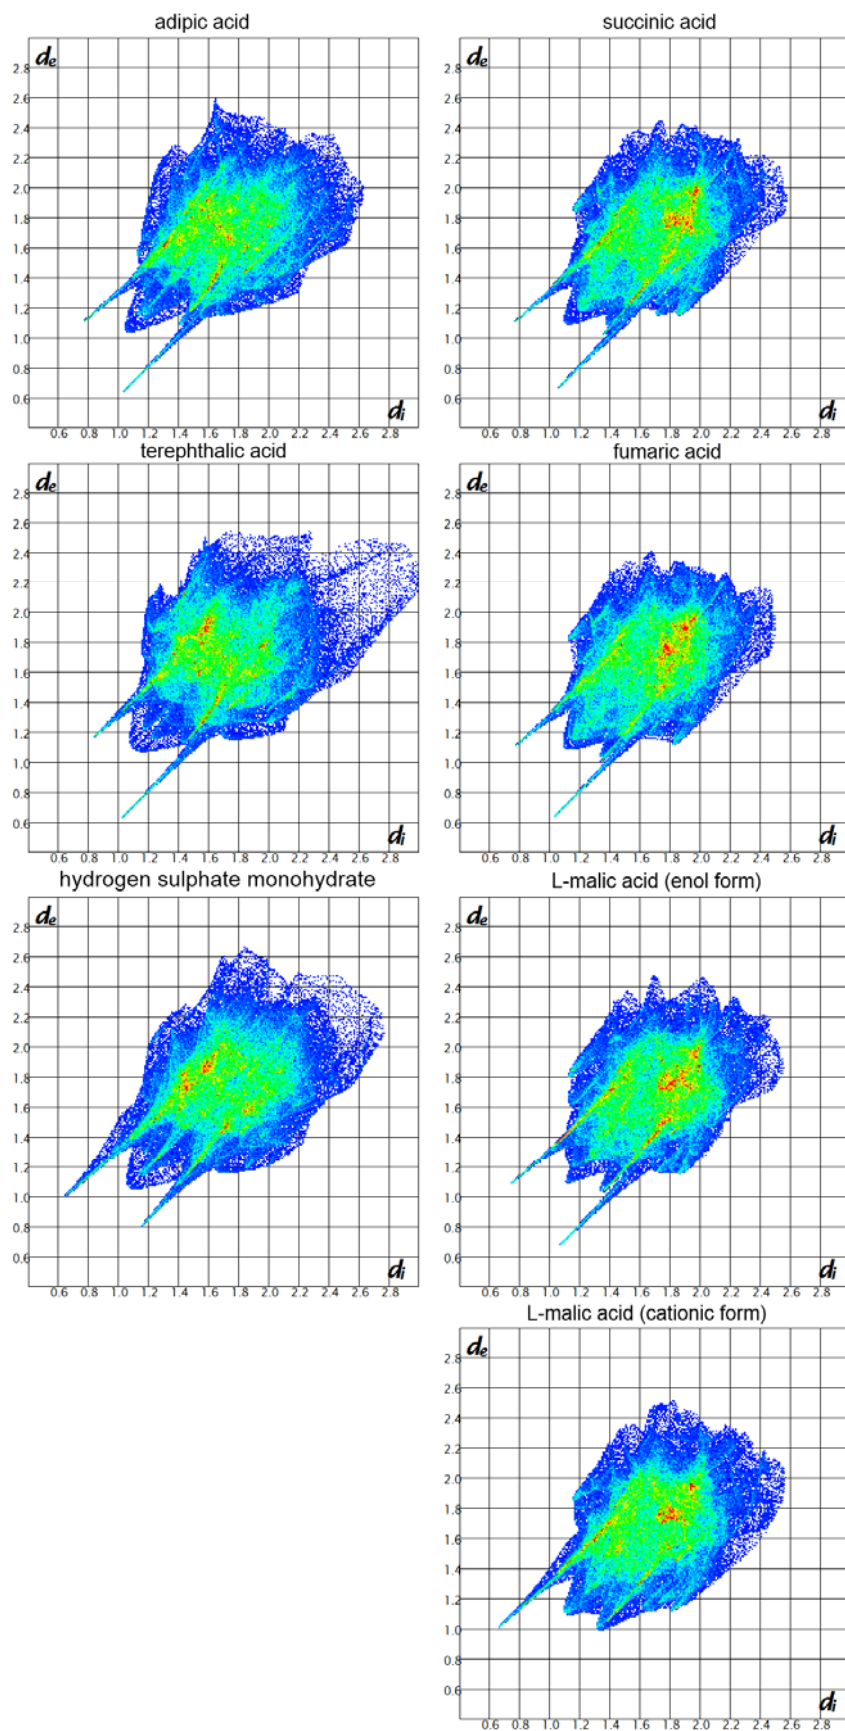

### ESI 5. Decomposed two-dimensional Hirshfeld fingerprint plots of structures of selected meloxicam co-crystals

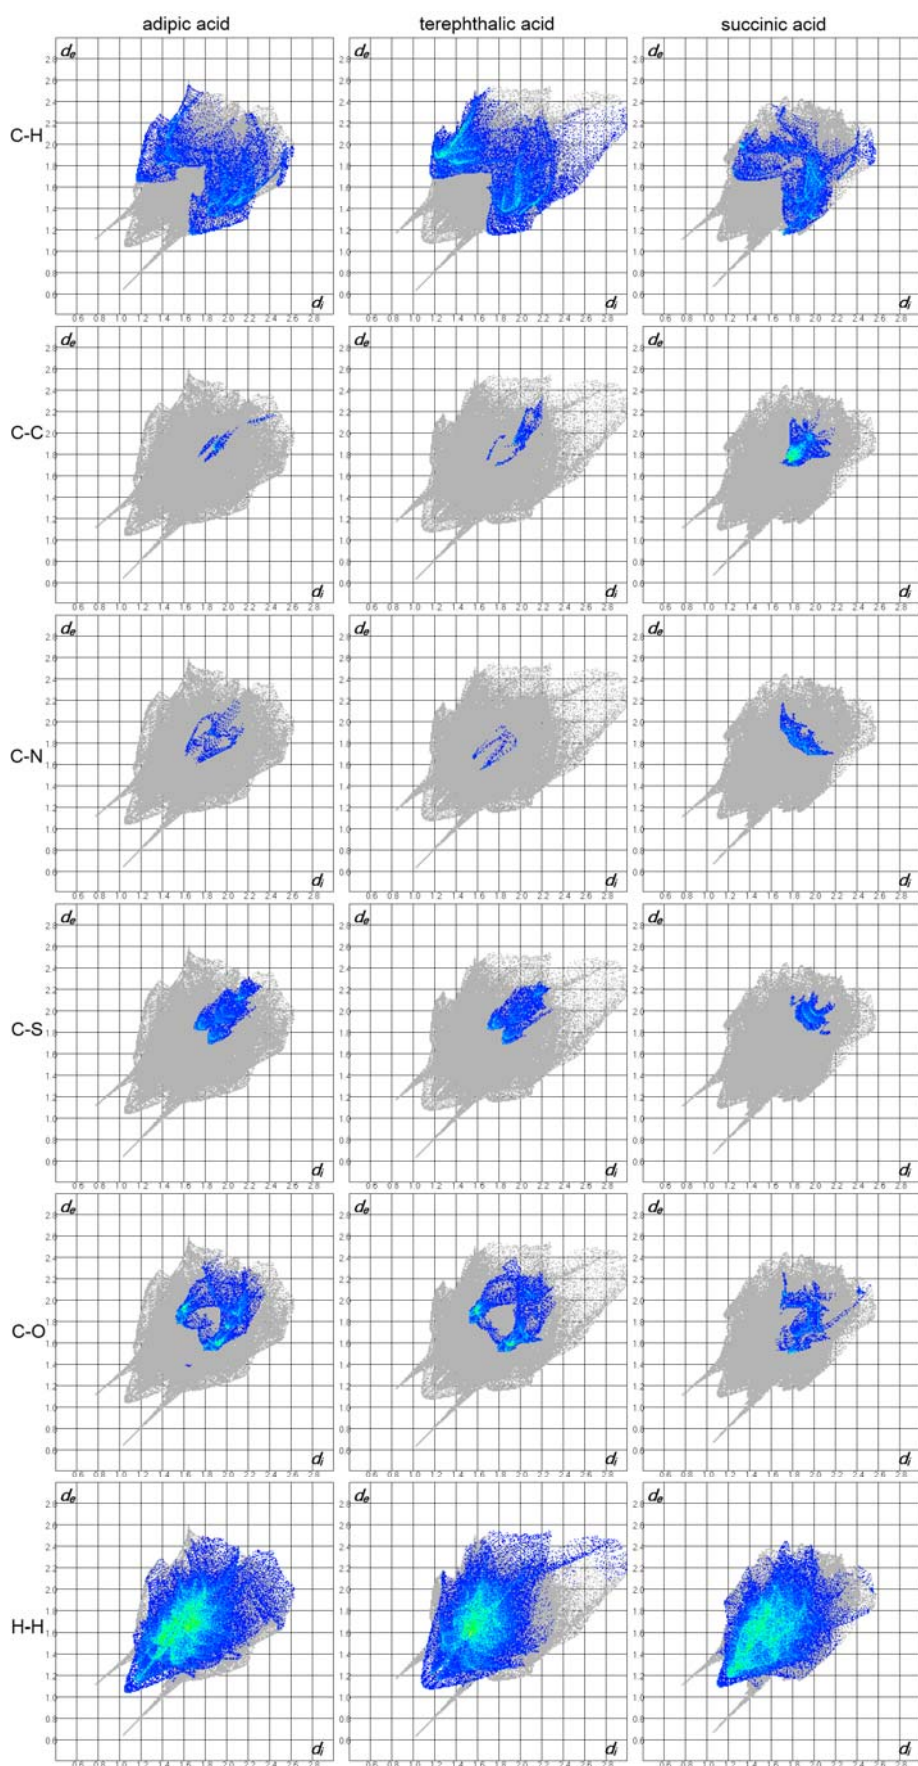

**ESI 5.** Decomposed two-dimensional Hirshfeld fingerprint plots of structures of selected meloxicam co-crystals (continued)

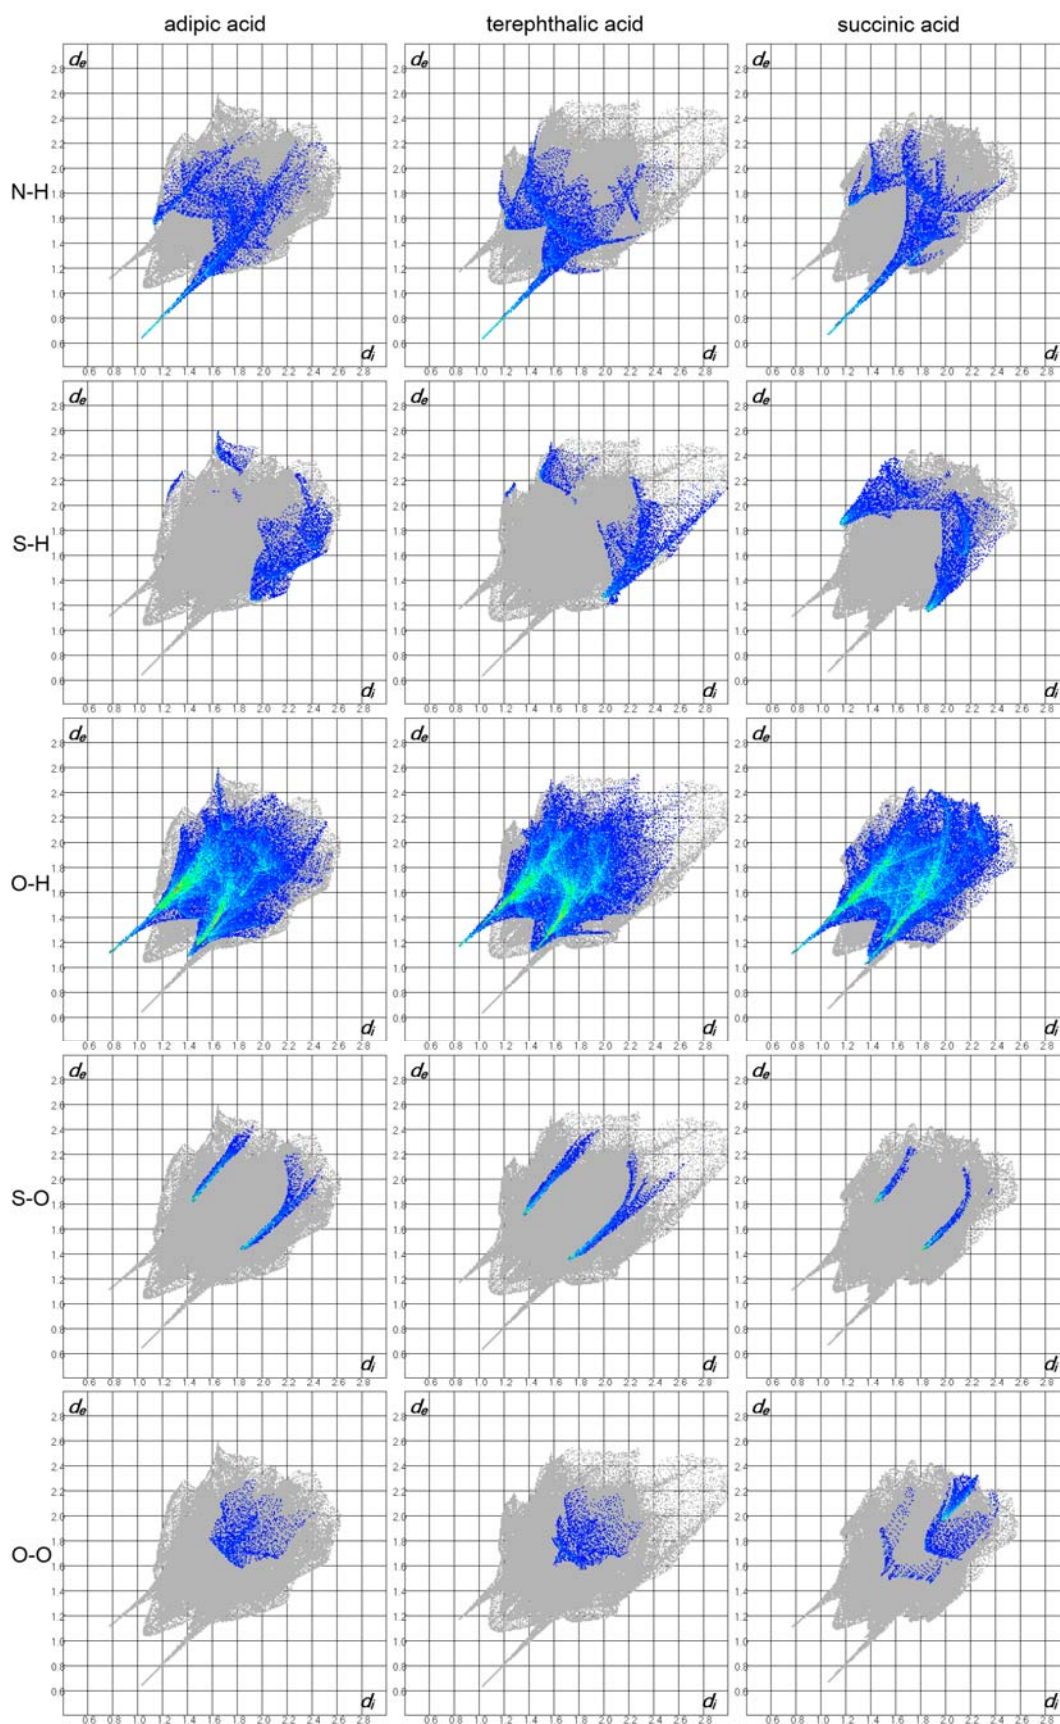

**ESI 6.** A tree diagram of crystal packing similarity

Selected examples of coinciding molecular clusters in the structures are shown. Arrows from nodes of the tree indicate at the corresponding clusters. Carbon atoms of one structure are coloured green, atoms in another structure are marked in a standard way. Green frames encircle the coinciding fragments of the structures, red frames - the fragments, which are different. The number of coinciding molecules in a cluster is shown close to the horizontal lines at the diagram. Structures grouped (e.g., 1, 2, 7) in the bottom row indicate that 15 out of 15 molecules in a cluster are similar, i.e. these crystals are considered to be isostructural. 1 - meloxicam - adipic acid co-crystal, 2 - meloxicam - terephthalic acid co-crystal, 3 - meloxicam - succinic acid co-crystal, 4 - meloxicam - fumaric acid co-crystal, 5 - meloxicam - L-malic acid co-crystal, 6 - meloxicam - glutaric acid co-crystal, 7 - meloxicam hydrogen sulphate monohydrate, 8 - trans-dichloro-(h<sup>2</sup>-ethylene)-(meloxicam)-platinum(ii) benzene solvate, 9 - meloxicam bromide, 10 - meloxicam, 11 - meloxicam - 1-hydroxy-2-naphthoic acid co-crystal, 12 - potassium salt monohydrate of meloxicam, 13 - cis-diammine-bis(meloxicamato)-platinum(ii) dimethylsulfoxide solvate tetrahydrate, 14 - trans-dimeloxicam-trans-bis(dimethylsulfoxide)-cobalt(ii), 15 - trans-dimeloxicam-trans-bis(dimethylsulfoxide)-zinc(ii), 16 - trans-dimeloxicam-trans-bis(dimethylsulfoxide)-cadmium(ii), 17 - ammonium meloxicam, 18 - meloxicam hydrate, 19 - bis(meloxicamato)-(dimethylformamide)-copper(ii) hydrate, 20 - meloxicam : salicylic acid co-crystal form III.

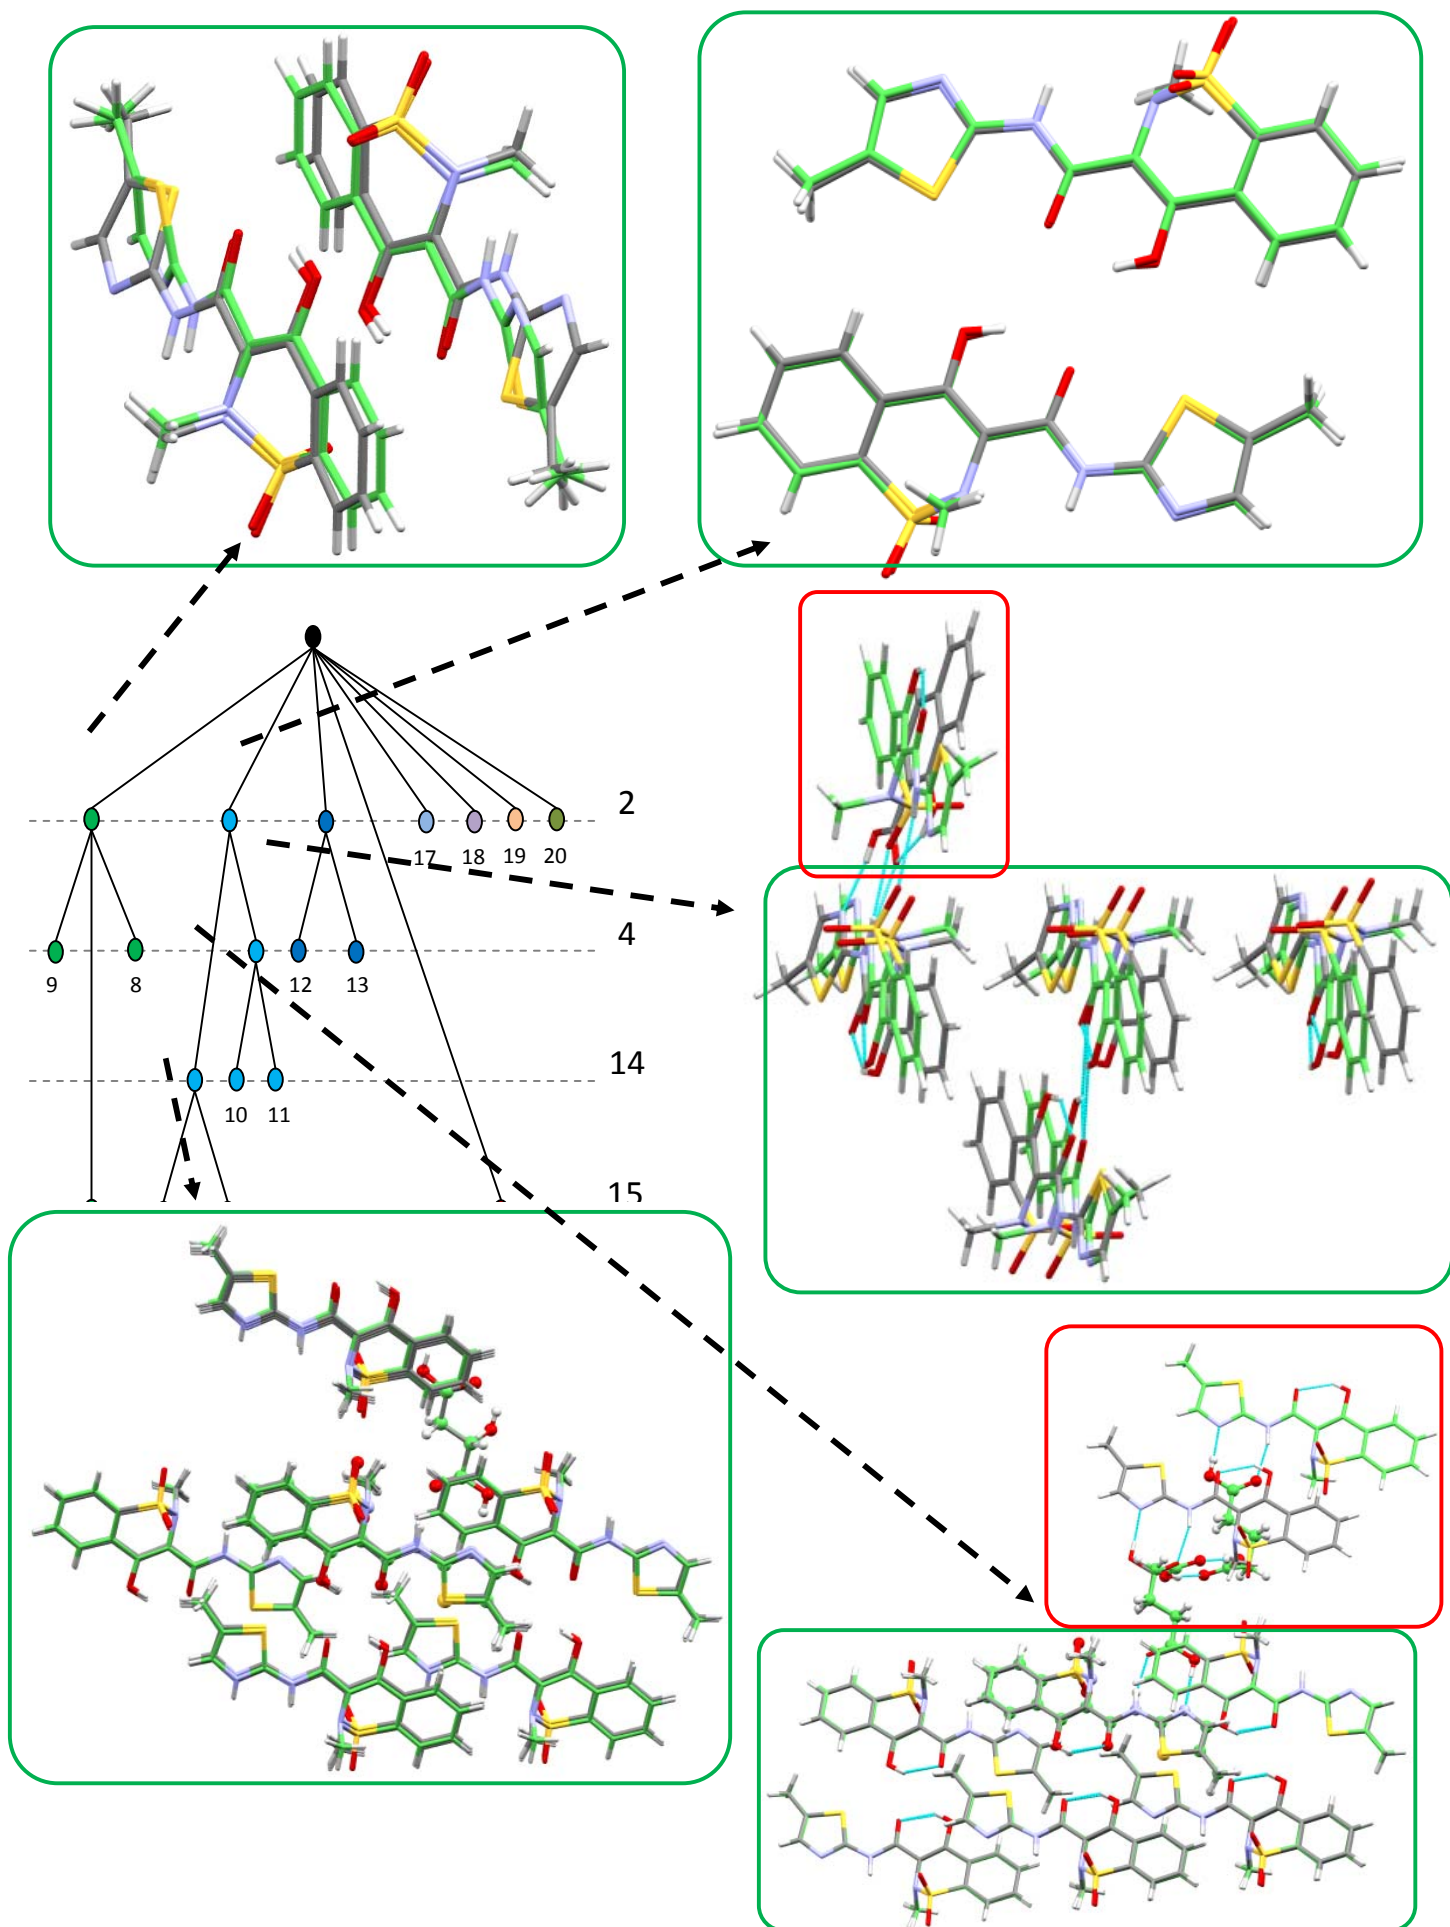

Supplement: c1ce05902e.pdf [file c1ce05902e.pdf]
